# Supplementary material for: Achieving Large-Capability Adsorption of Hg0 in Wet Scrubbing by Defect-Rich Colloidal Copper Sulfides under High-SO2 Atmosphere
Source: MDPI journal article supplement (doi:10.3390/ma16083157), 2023-04-17
Supplement: s1 [file s1]

# Achieving Large-capability Adsorption of Hg<sup>0</sup> in Wet Scrubbing by Defect-rich Colloidal Copper Sulfides under High-SO<sub>2</sub> Atmosphere

Xiaofeng Xie<sup>1</sup>, Hao Chen<sup>1</sup>, Xudong Liu<sup>1</sup>, Kaisong Xiang<sup>1,2,3,\*</sup>, Hui Liu<sup>1,2,3,\*</sup>

<sup>1</sup> School of Metallurgy and Environment, Central South University, Changsha 410083, China

<sup>2</sup> State Key Laboratory of Advanced Metallurgy for Non-ferrous Metals, Changsha 410083, China

<sup>3</sup> Chinese National Engineering Research Center for Control & Treatment of Heavy Metal Pollution, Changsha 410083, China

\* Corresponding address:

Hui Liu: leolau@csu.edu.cn

Kaisong Xiang: xiangkaisong@hotmail.com

## FIGURES:

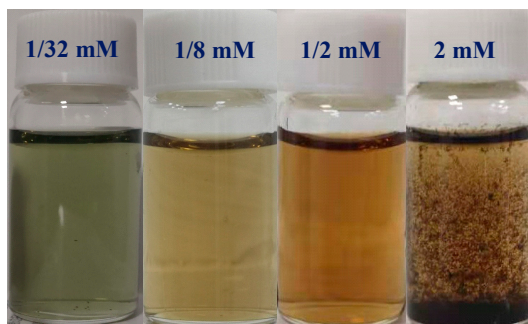

**Figure S1.** Pictures of c-CuS prepared at different concentration.

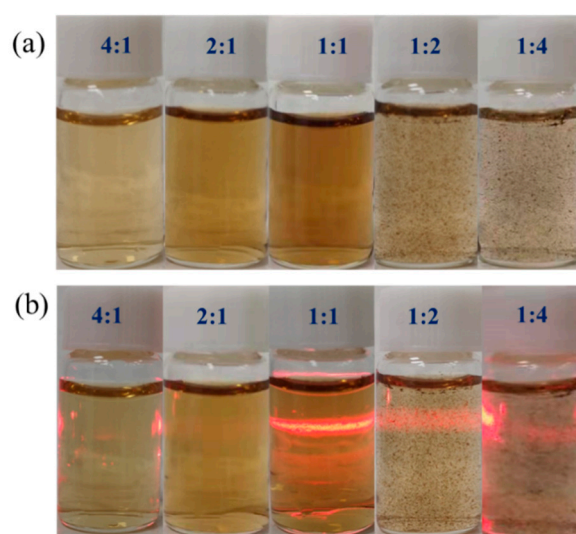

**Figure S2.** (a) The pictures of c-CuS prepared with different Cu: S ratio. (b) Their phenomenon of Tyndall Effect.

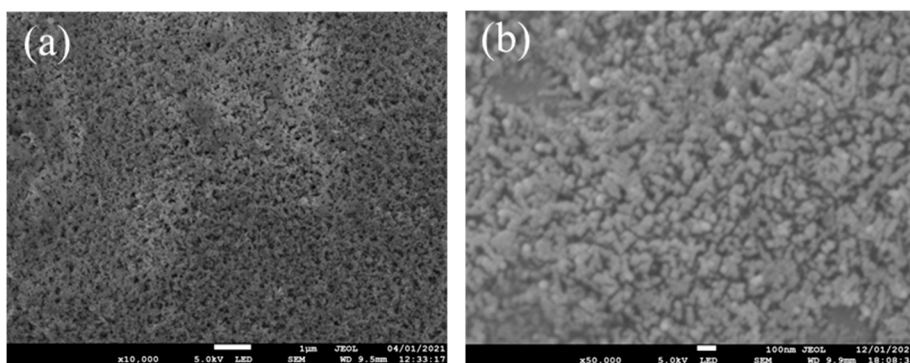

**Figure S3.** The SEM images of c-CuS (Prepared condition of c-CuS was the concentration of  $1/2 \text{ mmol}\cdot\text{L}^{-1}$  and the Cu:S raw material ratio of 1:1 by using a single-jet liquid-phase sulfidation method)

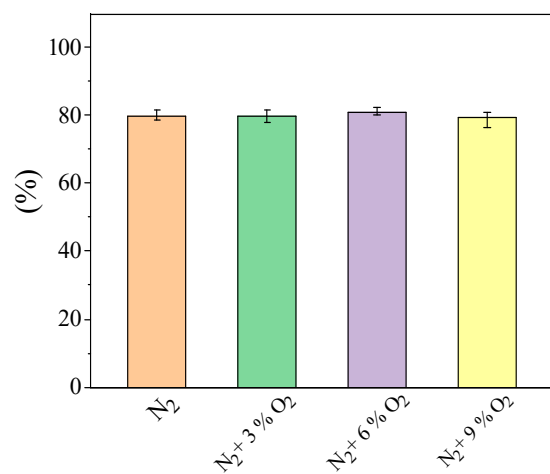

**Figure S4.** The effect of  $O_2$ .

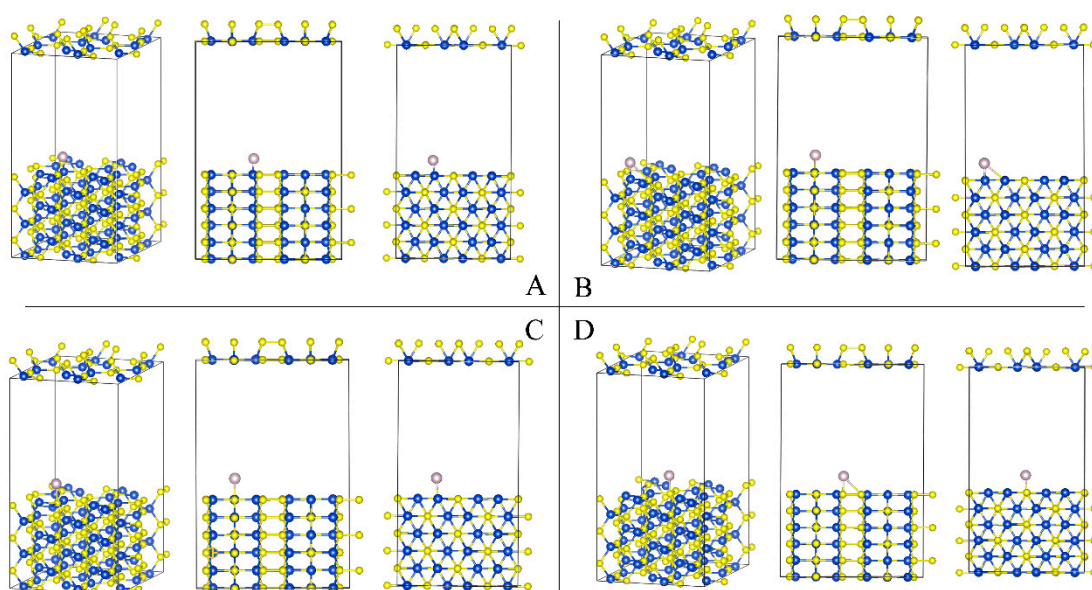

**Figure S5.** The structure of configurations A, B, C, and D after mercury adsorption.

## TABLES:

**Table S1.** List of experimental conditions for Hg<sup>0</sup> capture.

| <i>Fig. number</i> | <i>Solution volume</i> | <i>Solution pH</i> | <i>Solution temperature</i> | <i>Flue gas</i>                           |
|--------------------|------------------------|--------------------|-----------------------------|-------------------------------------------|
| 1a~1d              | 80 mL                  | 3.0                | 20 °C                       | N <sub>2</sub>                            |
| 3a,3b              | 80 mL                  | 3.0                | 20 °C                       | 6% vol SO <sub>2</sub> +N <sub>2</sub>    |
| 4a                 | 80 mL                  | 3.0                | 20 °C                       | N <sub>2</sub>                            |
| 4c                 | 10 mL                  | 3.0                | 20 °C                       | SFG+890µg·m <sup>-3</sup> Hg <sup>0</sup> |

SFG: 6% vol O<sub>2</sub>+6% vol SO<sub>2</sub>+88% vol N<sub>2</sub>.

**Table S2.** Hg<sup>0</sup> adsorption capacities and rates different sulfide sorbents.

| <i>Sorbents</i>                        | <i>Hg<sup>0</sup> adsorption capacities (mg·g<sup>-1</sup>)</i> | <i>Average Hg<sup>0</sup> adsorption rates (µg·g<sup>-1</sup>·min<sup>-1</sup>)</i> | <i>SO<sub>2</sub>/O<sub>2</sub> vol percentage</i> | <i>Reference</i> |
|----------------------------------------|-----------------------------------------------------------------|-------------------------------------------------------------------------------------|----------------------------------------------------|------------------|
| CA-CuS                                 | 736.49                                                          | 306.88                                                                              | 6/6                                                | This work        |
| CuS@PUF                                | 265.60                                                          | 442.60                                                                              | 0/0                                                | [1]              |
| CuS                                    | 122.40                                                          | 13.56                                                                               | 0/5                                                | [2]              |
| Fe <sub>3</sub> O <sub>4</sub> @CuS    | 88.70                                                           | 13.25                                                                               | 0/0                                                | [3]              |
| ZnO@CuS                                | 60.53                                                           | 16.81                                                                               | 0/0                                                | [4]              |
| Nano-CuS                               | 50.17                                                           | 71.60                                                                               | 0/0                                                | [5]              |
| Co <sub>3</sub> S <sub>4</sub>         | 43.03                                                           | 84.10                                                                               | 0/0                                                | [6]              |
| FeS <sub>1.32</sub> Se <sub>0.11</sub> | 20.22                                                           | 3.7                                                                                 | 2.5/6                                              | [7]              |
| Cu <sub>x</sub> S <sub>y</sub> @AC     | 3.92                                                            | 2.18                                                                                | 1.5/5                                              | [8]              |
| S/FeS <sub>2</sub>                     | 2.73                                                            | 0.91                                                                                | 0/0                                                | [9]              |
| Nano-ZnS                               | 0.49                                                            | 0.26                                                                                | 0/0                                                | [10]             |
| Fe-ZnS                                 | 0.26                                                            | 1.42                                                                                | 0/0                                                | [11]             |

## REFERENCES

- [1] H. Li, Q. Yang, W. Qu, Y. Feng, L. Leng, J. Zhao, F. Meng, Z. Yang, J. Yang, Facile preparation of nanosized copper sulfide functionalized macroporous skeleton for efficient vapor-phase mercury sequestration, *Chemical Engineering Journal* 419 (2021) 129561.
- [2] W. Liu, H. Xu, Y. Liao, Z. Quan, S. Li, S. Zhao, Z. Qu, N. Yan, Recyclable CuS sorbent with large mercury adsorption capacity in the presence of SO<sub>2</sub> from non-ferrous metal smelting flue gas, *Fuel* 235 (2019) 847-854.
- [3] Z. Yang, H. Li, C. Liao, J. Zhao, S. Feng, P. Li, X. Liu, J. Yang, K. Shih, Magnetic rattle-type Fe<sub>3</sub>O<sub>4</sub>@ CuS nanoparticles as recyclable sorbents for mercury capture from coal combustion flue gas, *ACS Applied Nano Materials* 1(9) (2018) 4726–4736.
- [4] Q. Hong, H. Xu, J. Li, W. Huang, P. Liu, Z. Qu, N. Yan, Shell-thickness-induced spontaneous inward migration of mercury in porous ZnO@ CuS for gaseous mercury immobilization, *Chemical Engineering Journal* 420 (2021) 127592.
- [5] Z. Yang, H. Li, S. Feng, P. Li, C. Liao, X. Liu, J. Zhao, J. Yang, P.-H. Lee, K. Shih, Multifunctional sulfur adsorption centers and copper-terminated active sites of nano-CuS for efficient elemental mercury capture from coal combustion flue gas, *Langmuir* 34(30) (2018) 8739-8749.
- [6] Z. Quan, W. Huang, Y. Liao, W. Liu, H. Xu, N. Yan, Z. Qu, Study on the regenerable sulfur-resistant sorbent for mercury removal from nonferrous metal smelting flue gas, *Fuel* 241 (2019) 451-458.
- [7] Z. Liu, Z. Li, X. Xie, S. Yang, J. Fei, Y. Li, Z. Xu, H. Liu, Development of recyclable iron sulfide/selenide microparticles with high performance for elemental mercury capture from smelting flue gas over a wide temperature range, *Environmental science & technology* 54(1) (2019) 604-612.
- [8] S. Yang, D. Wang, H. Liu, C. Liu, X. Xie, Z. Xu, Z. Liu, Highly stable activated carbon composite material to selectively capture gas-phase elemental mercury from smelting flue gas: Copper polysulfide modification, *Chemical Engineering Journal* 358 (2019) 1235-1242.
- [9] H. Li, W. Zhu, J. Yang, M. Zhang, J. Zhao, W. Qu, Sulfur abundant S/FeS<sub>2</sub> for efficient removal of mercury from coal-fired power plants, *Fuel* 232 (2018) 476-484.
- [10] H. Li, L. Zhu, J. Wang, L. Li, K. Shih, Development of nano-sulfide sorbent for efficient removal of elemental mercury from coal combustion fuel gas, *Environmental science & technology* 50(17) (2016) 9551-9557.
- [11] Y. Xia, G. Wei, X. Liang, J. Zhu, H. Xian, X. Su, H. He, R. Zhu, Sequestration of Gaseous Hg<sup>0</sup> by Sphalerite with Fe Substitution: Performance, Mechanism, and Structure–Activity Relationship, *The Journal of Physical Chemistry C* 123(5) (2019) 2828-2836.
